# Supplementary material for: Species catalogue of Drymaeus (Mesembrinus) Alberts, 1850 (Gastropoda: Bulimulidae) from Brazil and new data on morphology and distribution of Drymaeus (Mesembrinus) interpunctus (Martens, 1887)
Source: PeerJ. 2023 Oct 6;11:e16037. doi: 10.7717/peerj.16037 (PMC10561649; doi:10.7717/peerj.16037)
Supplement: Supplemental Information 3 [file peerj-11-16037-s003.xlsx]

## Sheet: checagem de registros
Species	Records					specimens preservation mode			Taxonomic identification checked?
	No. of records	Literature	Databases	Malacological Colections (information provided by the curators)	Countries	Dry	Ethanol	Not informed	Yes	No
D. (M.) interpunctus	119	8	41	70	Uruguay (3), Argentina (12), Paraguay (17), Brazil (87).	48	35	28	18	93
D. (M.) dutaillyi	2	0	2	0	Brazil (2)	2	0	0	1	1
D. (M.) gereti	19	3	13	3	Brazil (19)	7	5	5	3	16
D. (M.) lynchi	7	2	5	0	Argentina (1), Paraguay (1), Bolívia (2), Brazil (3)	1	0	5	1	6
D. (M.) puellaris	20	1	16	3	Bolívia (1), Brazil (19)	12	0	6	1	19
D. (M.) oreades	21	3	11	7	Argentina (1), Brazil (20)	12	4	2	4	17
D. (M.) rufolineatus	8	5	3	0	Guiana (1), French Guiana (2), Cayene (1), Brazil (4)	0	0	8	3	5
D. (M.) dominicus	2	9	2	0	Brazil (1), Colombia (1)	2	0	0	1	1
D. (M.) imperfectus	13	1	9	3	Trinidad & Tobago (4), Venezuela (4), Brazil (1)	4	0	8	3	9
D. (M.) membranaceus	7	4	3	0	Brazil (3), Venezuela (2), Mexico (2)	0	0	7	0	7
D. (M.) nigrofasciatus	38	0	36	2	Ecuador (1), Perú (2), Venezuela (3), Colombia (31)	4	0	9	25	12
D. (M) roseatus	4	1	3	0	Brazil (2), Venezuela (2)	1	0	3	1	3
D. (M.) ziegleri	11	4	2	5	Argentina (1), Mexico (1), Perú (1), United States (1), Brazil ( 7)	5	0	2	5	6
TOTAL	271	41	146	93		82	44	83	66	195
%	1	15.1292	53.8745	34.3173
