# Supplementary material for: Species catalogue of Drymaeus (Mesembrinus) Alberts, 1850 (Gastropoda: Bulimulidae) from Brazil and new data on morphology and distribution of Drymaeus (Mesembrinus) interpunctus (Martens, 1887)
Source: PeerJ. 2023 Oct 6;11:e16037. doi: 10.7717/peerj.16037 (PMC10561649; doi:10.7717/peerj.16037)
Supplement: Supplemental Information 5 [file peerj-11-16037-s005.xlsx]

## Sheet: Mesembrinus
species	country	province	municipality	locality	longitude	latitude	origem
drymaeus_mesembrinus_interpunctus	AR	Misiones	Iguazu	Parque_Nacional_Iguazú	-54.4547	-65.6832	museum deposit
drymaeus_mesembrinus_interpunctus	BR	SP	Perus		-46.747	-23.4063	museum deposit
drymaeus_mesembrinus_interpunctus	BR	SP	Piracicaba		-47.6448	-22.7274	literature
drymaeus_mesembrinus_interpunctus	BR	SP	Piquette		-45.185	-22.6115	museum deposit
drymaeus_mesembrinus_interpucntus	BR	SC	Nova_Teotonia		-52.4	-27.05	museum deposit
drymaeus_mesembrinus_interpunctus	PY	Villarica	Guayra	Arroyo_Dona_Joana	-56.37	-25.8303	museum deposit
drymaeus_mesembrinus_interpunctus	PY	Canindeyu		Comunidade_indígena_Chupa_Polu_11km_Villa_Ygatimi	-55.25	-24.25	museum deposit
drymaeus_mesembrinus_interpunctus	PY	San_Estanislao			-56.4333	-24.65	museum deposit
drymaeus_mesembrinus_interpunctus	BO	Santa_Cruz	Buena_Vista		-63.6588	-17.4566	museum deposit
drymaeus_mesembrinus_interpunctus	BR	RS	Pelotas		-52.3333	-31.7667	museum deposit
drymaeus_mesembrinus_interpunctus	BR	RS		Praia_Molhes_da_Barra_do_Rio_Grande	-52.1002	-32.1595	museum deposit
drymaeus_mesembrinus_interpunctus	AR	Misiones	Eldorado		-54.6946	-26.4084	museum deposit
drymaeus_mesembrinus_interpunctus	AR	Misiones	Cerro_Cora		-55.6047	-27.1128	museum deposit
drymaeus_mesembrinus_interpunctus	AR	Guarani	El_Soberbio		-54.1988	-27.2985	literature
drymaeus_mesembrinus_interpunctus	AR	Misiones	Posadas		-55.9009	-27.3621	literature
drymaeus_mesembrinus_interpunctus	AR	Candelaria	Cerro_Cora		-63.355	-29.814	literature
drymaeus_mesembrinus_interpunctus	BR	SP	Avanhandava		-49.9482	-21.462	literature
drymaeus_mesembrinus_interpunctus	BR	SP	Iguape		-47.5559	-24.7059	museum deposit
drymaeus_mesembrinus_interpunctus	BR	MG	Pedro_Leopoldo	Gruta_da_Cerca_Grande	-44.0558	-19.6388	museum deposit
drymaeus_mesembrinus_interpunctus	BR	BA	Salvador		-38.5016	-12.9778	museum deposit
drymaeus_mesembrinus_interpunctus	BR	SP	Porto_Feliz	Fazenda_Paraguaçú	-47.5213	-23.2124	museum deposit
drymaeus_mesembrinus_interpunctus	BR	SP		corredeira_de_meia_legua_rio_tiete_inferior	-47.8833	-23.8333	museum deposit
drymaeus_mesembrinus_interpunctus	BR	SP		Estação_Raiz_da_Terra	-46.3834	-23.8995	museum deposit
drymaeus_mesembrinus_interpunctus	BR	SP	Sao_Paulo	Cantareira	-46.6	-23.4142	museum deposit
drymaeus_mesembrinus_interpunctus	BR	SP	Itatiba		-46.85	-23	museum deposit
drymaeus_mesembrinus_interpunctus	BR	RJ	Petropolis		-43.1566	-22.402	museum deposit
drymaeus_mesembrinus_interpunctus	BR	SP	Santo_Andre	Piranapiacaba_estrada_ecol_alto_da_serra	-46.3102	-23.7361	museum deposit
drymaeus_mesembrinus_interpunctus	BR	SP	Itapeva		-48.875	-23.9802	museum deposit
drymaeus_mesembrinus_interpunctus	PY	Puerto_bertoni			-54.5931	-25.6576	museum deposit
drymaeus_mesembrinus_interpunctus	BR	RS	Itaguai		-43.7739	-22.8708	museum deposit
drymaeus_mesembrinus_interpunctus	PY	Sapucay			-56.9521	-25.6666	museum deposit
drymaeus_mesembrinus_interpunctus	BR	MG	Sabara		-43.81	-19.8881	museum deposit
drymaeus_mesembrinus_interpunctus	BR	SP	Barueri		-46.8833	-23.5167	museum deposit
drymaeus_mesembrinus_interpunctus	BR	RJ	Cabo_Frio		-42.0289	-22.8864	museum deposit
drymaeus_mesembrinus_interpunctus	BR	MG	Pouso_Alegre		-45.9381	-22.23	museum deposit
drymaeus_mesembrinus_interpunctus	BR	SP	Itapira		-46.8349	-22.4403	museum deposit
drymaeus_mesembrinus_interpunctus	BR	SP	Itu	Fazenda_Pau_d´Alho	-47.2871	-23.3146	museum deposit
drymaeus_mesembrinus_interpunctus	BR	SP	Nova_Europa	Fazenda_Itaquere	-48.563	-27.7812	museum deposit
drymaeus_mesembrinus_interpunctus	BR	MG	Pedro_Leopoldo	Cerca_Grande	-44.0558	-19.6388	museum deposit
drymaeus_mesembrinus_interpunctus	BR	SP	Campos_do_Jordão	Eugênio_Lefevre	-45.629	-22.8257	museum deposit
drymaeus_mesembrinus_interpunctus	BR	ES		Rio_Doce	-41.5333	-21.1	museum deposit
drymaeus_mesembrinus_interpunctus	BR	SP	Jandira	est_ferro_Sorocaba	-46.9042	-23.5424	museum deposit
drymaeus_mesembrinus_interpunctus	BR	MT	Três_Lagoas	Fazenda_J_Mendes	-51.7096	-20.7962	museum deposit
drymaues_mesembrinus_interpunctus	BR	SP	Castilho	margem_esquerda_Rio_Parana	-51.6065	-20.887	museum deposit
drymaeus_mesembrinus_interpunctus	BR	SP	Valinhos		-46.9938	-22.9739	museum deposit
drymaeus_mesembrinus_interpunctus	BR	PR	Curitiba	Chácara_do_Macedo	-50.0783	-25.4967	museum deposit
drymaeus_mesembrinus_interpunctus	BR	PR	Cornélio_Procópio	Fazenda_Pilar	-50.5615	-23.1881	museum deposit
drymaeus_mesembrinus_interpunctus	BR	SP	São_Paulo	Lussanvira	-51.1167	-20.7	museum deposit
drymaeus_mesembrinus_interpunctus	BR	SP	Cubatão	fabrica	-47.9453	-24.9723	museum deposit
drymaeus_mesembrinus_interpunctus	BR	PR	Curitiba	Chácara_do_Macedo	-25.61.2473	-49.3127	museum deposit
drymaeus_mesembrinus_interpunctus	BR	MT	Rondonópolis	ap_20km_cidade	-54.7176	-16.461	museum deposit
drymaeus_mesembrinus_interpunctus	BR	ES	Baixo_Guandú		-41.0172	-19.5121	museum deposit
drymaeus_mesembrinus_interpunctus	BR	SP	São_Paulo	Alto_da_Serra	-46.311	-27.7836	museum deposit
drymaeus_mesembrinus_interpunctus	BR	RS	Santa_Maria	Rio_Verde	-53.7005	-29.7084	museum deposit
drymaeus_mesembrinus_interpunctus	BR	RS	Perequê	Fazenda_Itaqueri	-46.1823	-23.9389	museum deposit
drymaeus_mesembrinus_interpunctus	BR	SP	Mogi_Guassú	mata_da_olaria_Fazenda_Campininha	-47.1514	-22.8863	museum deposit
drymaeus_mesembrinus_interpunctus	BR	GO	Nova_Roma	Cana_Brava	-46.7658	-12.9008	museum deposit
drymaeus_mesembrinus_interpunctus	BR	SP	Pirassununga	eecp_Pirassununga	-47.3795	-21.9492	museum deposit
drymaeus_mesembrinus_interpunctus	BR	PA	Barreirinha	Rio_Tapajós	-56.626	-4.73467	museum deposit
drymaeus_mesembrinus_interpunctus	BR	SP	Amparo	Monte_Alegre	-46.765	-22.7056	museum deposit
drymaeus_mesembrinus_interpunctus	BR	SP	Itapetininga		-48.0408	-23.5871	museum deposit
drymaeus_mesembrinus_interpunctus	BR	SP	Mogi_das_Cruzes	Rancho_Carmelita	-46.1923	-23.5258	museum deposit
drymaeus_mesembrinus_interpunctus	BR	PA	Santarém	Taperinha	-54.304	-2.49107	museum deposit
drymaeus_mesembrinus_interpunctus	BR	SP	Monte_Alegre	Fazenda_Ponte_Alta	-46.6826	-22.69	museum deposit
drymaeus_mesembrinus_interpunctus	BR	SP	Marília		-49.9486	-22.2144	museum deposit
drymaeus_mesembrinus_interpunctus	BR	SP	Caraguatatuba	between_Caraguatatuba_Paraibuna	-45.4063	-23.6217	museum deposit
drymaeus_mesembrinus_interpunctus	BR	MS	Aquidauana	Distrito_de_Piraputanga	-55.5402	-20.4699	museum deposit
drymaeus_mesembrinus_interpunctus	BR	PR	Ponta_Grossa		-50.15	-25.0833	museum deposit
drymaeus_mesembrinus_interpunctus	BR	RS	Encantado	Morro_Santa_Antão	-51.8761	-29.2412	museum deposit
drymaeus_mesembrinus_interpunctus	BR	RS	Santa_Maria	cism_eq_zool	-53.8439	-29.7381	museum deposit
drymaeus_mesembrinus_interpunctus	BR	RS	Santa_Maria	Santo_Antão	-53.8472	-29.6572	museum deposit
drymaeus_mesembrinus_interpunctus	BR	RS	Santa_Maria	Caturrita	-58.8428	-29.67	museum deposit
drymaeus_mesembrinus_interpunctus	BR	RS	Santa_Maria	Saturnino_Brito	-58.8126	-29.8881	museum deposit
drymaeus_mesembrinus_interpunctus	BR	RS	São_Martinho		-53.9667	-27.7167	museum deposit
drymaeus_mesembrinus_interpunctus	BR	RS	Santa_Maria	Boca_do_Monte	-53.9177	-29.6498	museum deposit
drymaeus_mesembrinus_interpunctus	BR	SP	Mogi_das_Cruzes	sesc_Itapeti	-46.2458	-23.5258	museum deposit
drymaeus_mesembrinus_interpunctus	BR	BA	Buerarema	Fazenda_Tororó	-39.3032	-14.96	museum deposit
drymaeus_mesembrinus_interpunctus	BR	SP	Valinhos		-46.9946	-22.9681	human_observation
drymaeus_mesembrinus_interpunctus	BR	RJ	Posse		-43.071	-22.2538	human_observation
drymaeus_mesembrinus_interpunctus	BR	SP	Água_de_Lindoia		-46.612	-22.4871	human_observation
drymaeus_mesembrinus_interpunctus	BR	PR	Foz_do_Iguaçú		-54.4382	-25.69	human_observation
drymaeus_mesembrinus_interpunctus	BR	RS	Guarruchos		-55.6588	-28.3457	human_observation
drymaeus_mesembrinus_interpunctus	BR	RS	Tapes		-51.3882	-30.648	human_observation
drymaeus_mesembrinus_interpunctus	BR	SC	Romelândia		-53.2477	-26.6624	human_observation
dryameus_mesembrinus_interpunctus	BR	PR	Curitiba	Boqueirão	-49.2497	-25.5128	human_observation
dryameus_mesembrinus_interpunctus	BR	RJ	Rio_de_Janeiro	Rua Marquês de São Vicente	-43.2337	-22.9783	human_observation
drymaeus_mesembrinus_interpunctus	BR	SP	Embu_das_Artes	Jardim_Branca_Flor	-46.8253	-23.6867	human_observation
drymaeus_mesembrinus_interpunctus	BR	PR	Foz_do_Iguaçú		-54.5854	-25.5163	human_observation
drymaeus_mesembrinus_interpunctus	BR	RS	Cerro_Largo		-54.7302	-28.1471	museum deposit
drymaeus_mesembrinus_interpunctus	BR	RS	São_Leopoldo		-51.15	-29.7667	museum deposit
drymaeus_mesembrinus_interpunctus	BR	RS	Paraiso_do_Sul		-53.1833	-29.6667	museum deposit
drymaeus_mesembrinus_interpunctus	BR	RS	Guaíba		-51.3167	-30.1111	museum deposit
drymaeus_mesembrinus_interpunctus	BR	RS	Porto_Alegre		-51.2	-30.0333	museum deposit
drymaeus_mesembrinus_interpunctus	BR	MG	Leopoldina		-42.6383	-21.5316	museum deposit
drymaeus_mesembrinus_interpunctus	BR	RJ	Mangaratiba	Serra_do_Piloto	-43.9997	-22.86	museum deposit
drymaeus_mesembrinus_interpunctus	BR	RJ	Mangaratiba	Praia_Grande	-44.0827	-22.9766	museum deposit
drymaeus_mesembrinus_interpunctus	BR	RJ	Teresópolis	Rua_Comary_Granja_Comary	-42.8705	-22.3111	museum deposit
drymaues_mesembrinus_interpunctus	BR	RJ	Cantagalo	Cooperativa_Agroecologica_Triângulo	-42.362	-21.9801	museum deposit
